# Supplementary material for: One-pot preparation of hierarchical Cu2O hollow spheres for improved visible-light photocatalytic properties
Source: Royal Society of Chemistry journal article supplement (doi:10.1039/d0ra02460k), 2020-01-01
Supplement: d0ra02460k1.pdf [file d0ra02460k1.pdf]

## Supporting Information

### One-Pot Preparation of Hierarchical $\text{Cu}_2\text{O}$ Hollow Spheres for Improved Visible-Light Photocatalytic Properties

Yali Dong<sup>a</sup>, Feifei Tao<sup>a,b,\*</sup>, Linxia Wang<sup>a,\*</sup>, Mingxuan Lan<sup>a</sup>, Jiayan Zhang<sup>a</sup> and Tianjie Hong<sup>a</sup>

<sup>1</sup> Department of Chemistry and Chemical Engineering, Shaoxing University, Zhejiang 312000, P.

R. China;

<sup>2</sup> Shanghai Advanced Research Institute Library, Chinese Academy Sciences, Shanghai 201210, P.

R. China

\* Correspondence: feifeitao@usx.edu.cn; Tel.: +86-575-88342505.

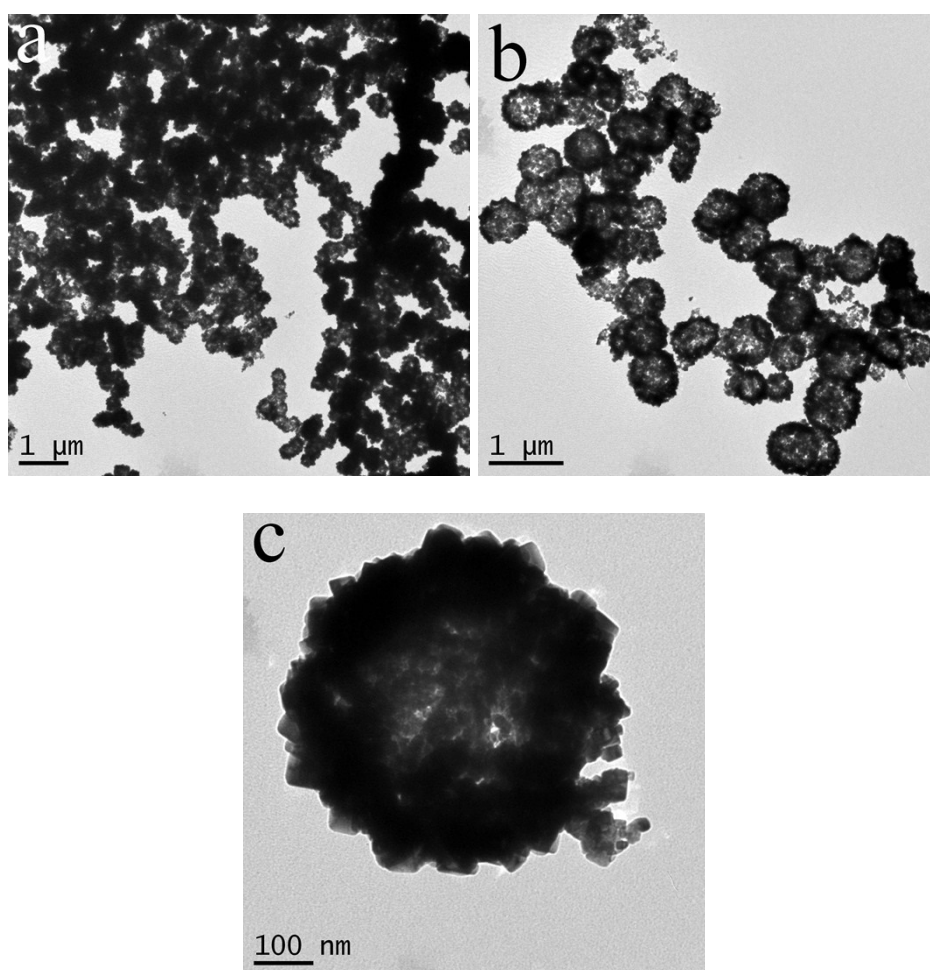

Fig. S1 TEM images of the as-prepared product at different magnification.

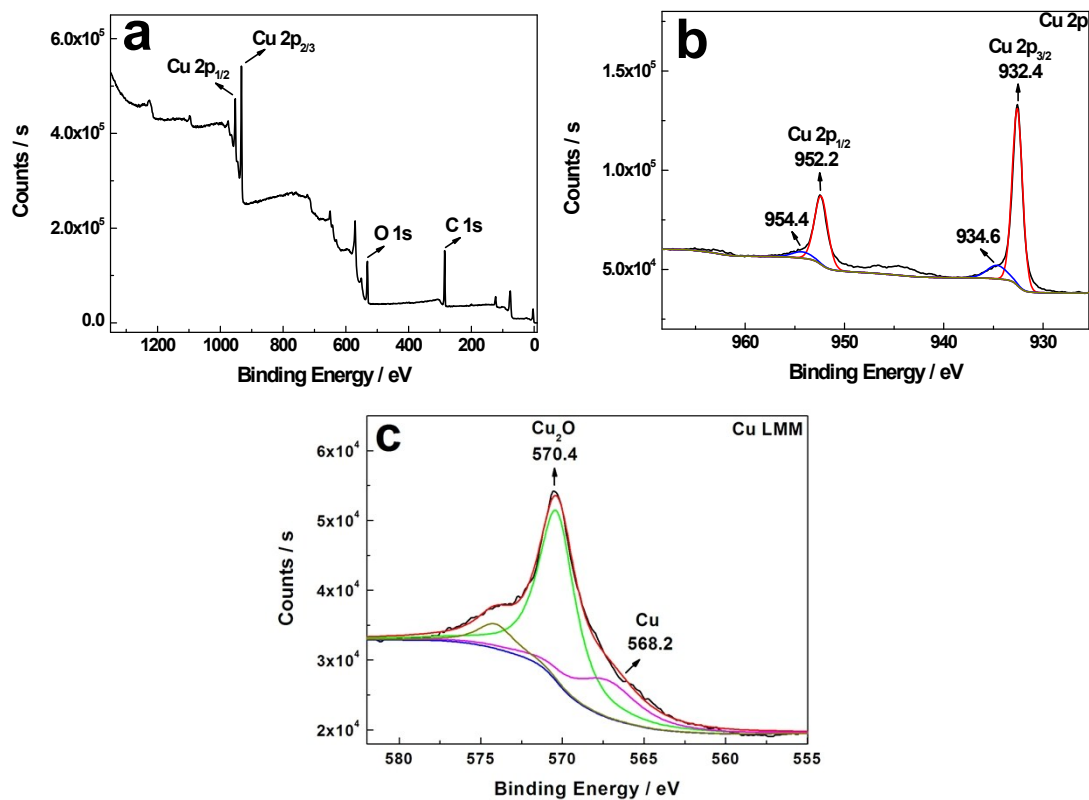

**Fig. S2** The XPS survey spectrum (a), high resolution Cu 2p XPS (b) and Auger Cu LMM spectra (c) of the as-prepared product.

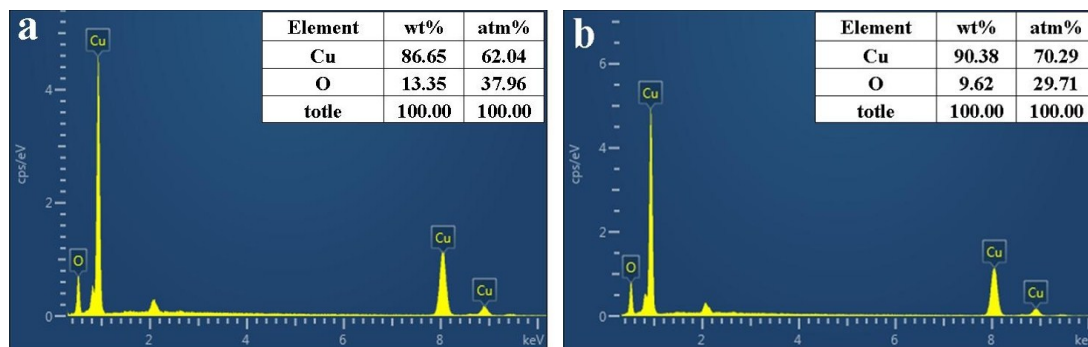

**Fig. S3** EDS patterns and elemental contents (inset) from bulk (a) and surface (b) of the as-prepared product.

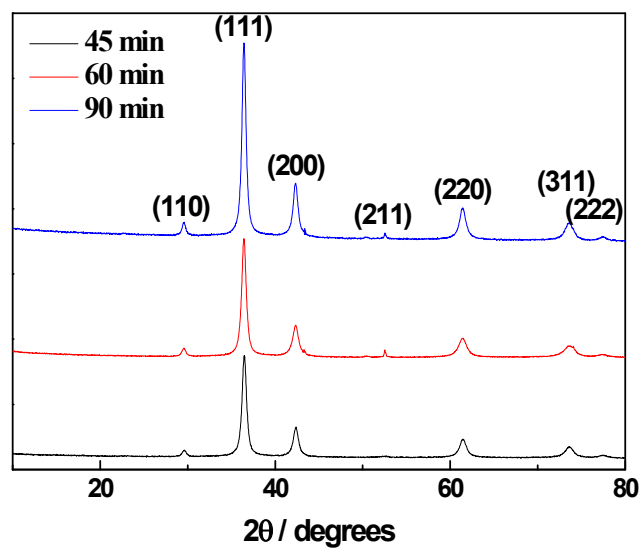

**Fig. S4** XRD patterns of the as-prepared products at the reaction time of 45, 60 and 90 min.

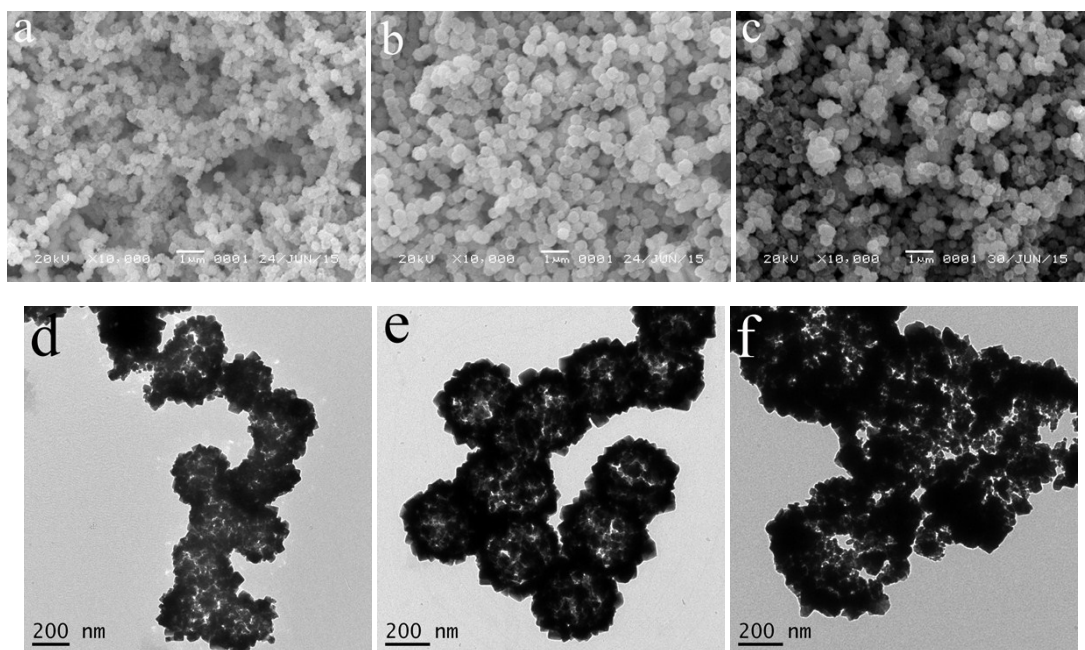

**Fig. S5** SEM (a-c) and TEM (d-f) images of the as-prepared products at the different temperatures: (a and d) 150 °C, (b and e) 160 °C, and (c and f) 180 °C.

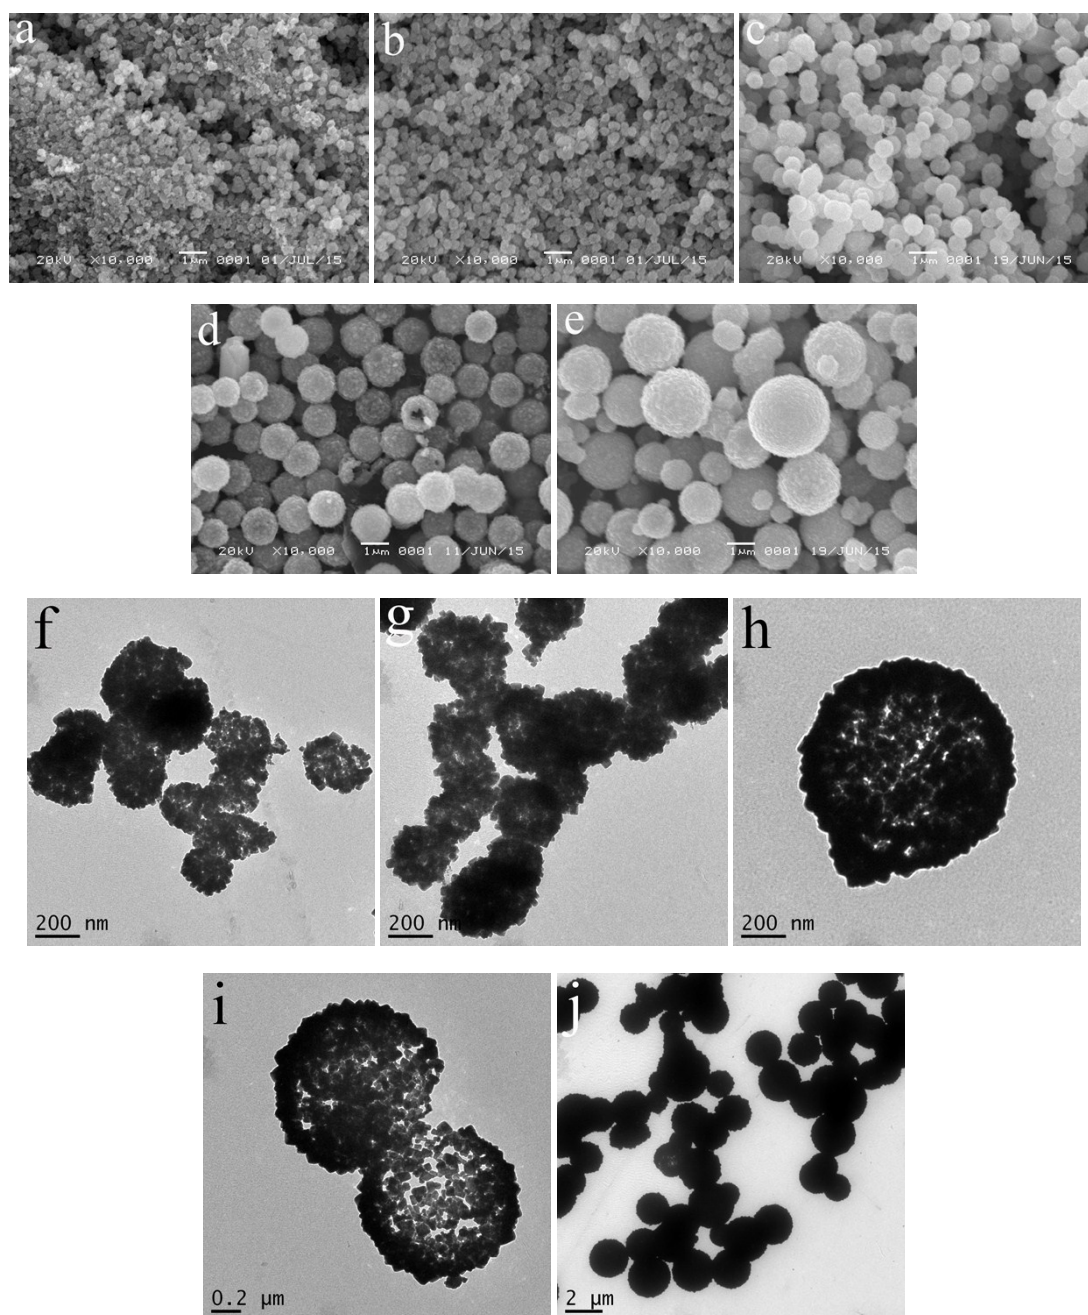

**Fig. S6** SEM (a-e) and TEM images (f-j) of the as-prepared products using the different [BMIM]BF<sub>4</sub> concentration: (a and f) 0.0125 mol·L<sup>-1</sup>, (b and g) 0.025 mol·L<sup>-1</sup>, (c and h) 0.075 mol·L<sup>-1</sup>, (d and i) 0.1 mol·L<sup>-1</sup>, and (e and j) 0.15 mol·L<sup>-1</sup>.

**Table S1** Comparison of the photocatalytic activities of various Cu<sub>2</sub>O catalysts for the degradation of MO.

| Photocatalyst                                                                                              | Light source                                   | Additive                      | Photocatalytic condition                                                                         | Degradation activity                                                                                                                                                                                                                                  | Degradation rate / (mmol · g <sup>-1</sup> · h <sup>-1</sup> )                                                                                                                                                           | Ref.       |
|------------------------------------------------------------------------------------------------------------|------------------------------------------------|-------------------------------|--------------------------------------------------------------------------------------------------|-------------------------------------------------------------------------------------------------------------------------------------------------------------------------------------------------------------------------------------------------------|--------------------------------------------------------------------------------------------------------------------------------------------------------------------------------------------------------------------------|------------|
| Cu <sub>2</sub> O hollow spheres                                                                           | 250 W xenon arc lamp ( $\lambda > 420$ nm)     | None                          | Photocatalyst: 10 mg<br>MO solution: 50 mL 20 mg · L <sup>-1</sup>                               | more than 90 % (20 min)<br>completely degraded (30 min)                                                                                                                                                                                               | 0.825                                                                                                                                                                                                                    | This study |
| rhombic dodecahedral Cu <sub>2</sub> O                                                                     | 500 W xenon lamp ( $\lambda = 400-700$ nm)     | None                          | Photocatalyst: 15 mg<br>MO solution: 100 mL 15 mg · L <sup>-1</sup>                              | 88.3 % (30 min)                                                                                                                                                                                                                                       | 0.540                                                                                                                                                                                                                    | 1          |
| Cu <sub>2</sub> O nanowires                                                                                | 500 W xenon lamp (420 nm < $\lambda$ < 780 nm) | None                          | Photocatalyst: 4 mg<br>MO solution: 100 mL 10 mg · L <sup>-1</sup>                               | 73 % (120 min)                                                                                                                                                                                                                                        | 0.279                                                                                                                                                                                                                    | 2          |
| Cu <sub>2</sub> O cubes                                                                                    | 500 W xenon lamp                               | None                          | Photocatalyst: 71.54 mg<br>MO solution: 90 mL 30 mg · L <sup>-1</sup>                            | ~20 % (90 min)                                                                                                                                                                                                                                        | 0.0154                                                                                                                                                                                                                   | 3          |
| Cu <sub>2</sub> O rhombic dodecahedra                                                                      | 500 W xenon lamp                               | None                          | Photocatalyst: 71.54 mg<br>MO solution: 90 mL 30 mg · L <sup>-1</sup>                            | almost completely degraded (90 min)                                                                                                                                                                                                                   | 0.0769                                                                                                                                                                                                                   | 3          |
| Cu <sub>2</sub> O nanowire polyhedra                                                                       | 500 W Xe lamp (380 nm < $\lambda$ < 700 nm)    | H <sub>2</sub> O <sub>2</sub> | Photocatalyst: 30 mg<br>MO solution: 50 mL 20 mg · L <sup>-1</sup>                               | complete degraded (40 min)                                                                                                                                                                                                                            | 0.153                                                                                                                                                                                                                    | 4          |
| oxygen-deficient Cu <sub>2</sub> O nanoparticles                                                           | cold white LED (16 mW · cm <sup>-2</sup> )     | None                          | Photocatalyst : 2 mg<br>MO solution: 20 mL 5 × 10 <sup>-5</sup> mol · L <sup>-1</sup>            | ~98 % (20 min)                                                                                                                                                                                                                                        | 1.47                                                                                                                                                                                                                     | 5          |
| Cu <sub>2</sub> O hierarchical nanoclusters                                                                | 150 W tungsten-halogen lamp                    | None                          | Photocatalyst: 0.01 g<br>MO solution: 100 mL 10 mg · L <sup>-1</sup> and 40 mg · L <sup>-1</sup> | completely degraded (12 min for 10 mg · L <sup>-1</sup> MO solution and 65 min for 40 mg · L <sup>-1</sup> )                                                                                                                                          | 1.528 (10 mg · L <sup>-1</sup> )<br>1.128 (40 mg · L <sup>-1</sup> )                                                                                                                                                     | 6          |
| octahedral, truncated octahedral, cuboctahedral, truncated cubic and cubic Cu <sub>2</sub> O microcrystals | 500 W xenon lamp ( $\lambda > 400$ nm)         | None                          | Photocatalyst: 0.025 g<br>MO solution: 50 mL 15 mg · L <sup>-1</sup>                             | 100 % for octahedral Cu <sub>2</sub> O (3 h)<br>76 % for truncated octahedral Cu <sub>2</sub> O (3 h)<br>28 % for cuboctahedral Cu <sub>2</sub> O (3 h)<br>36 % for truncated cubic Cu <sub>2</sub> O (3 h)<br>17 % for cubic Cu <sub>2</sub> O (3 h) | 0.0306 (octahedral Cu <sub>2</sub> O)<br>0.0232 (truncated octahedral Cu <sub>2</sub> O)<br>0.00855 (cuboctahedral Cu <sub>2</sub> O)<br>0.0100 (truncated cubic Cu <sub>2</sub> O)<br>0.00519 (cubic Cu <sub>2</sub> O) | 7          |

Cu<sub>2</sub>O spheres      1000 W Xe      Photocatalyst: 15.0 mg      also      completely      0.244  
 arc lamp      None      MO solution: 60.0 mL      degraded (4 h)

8

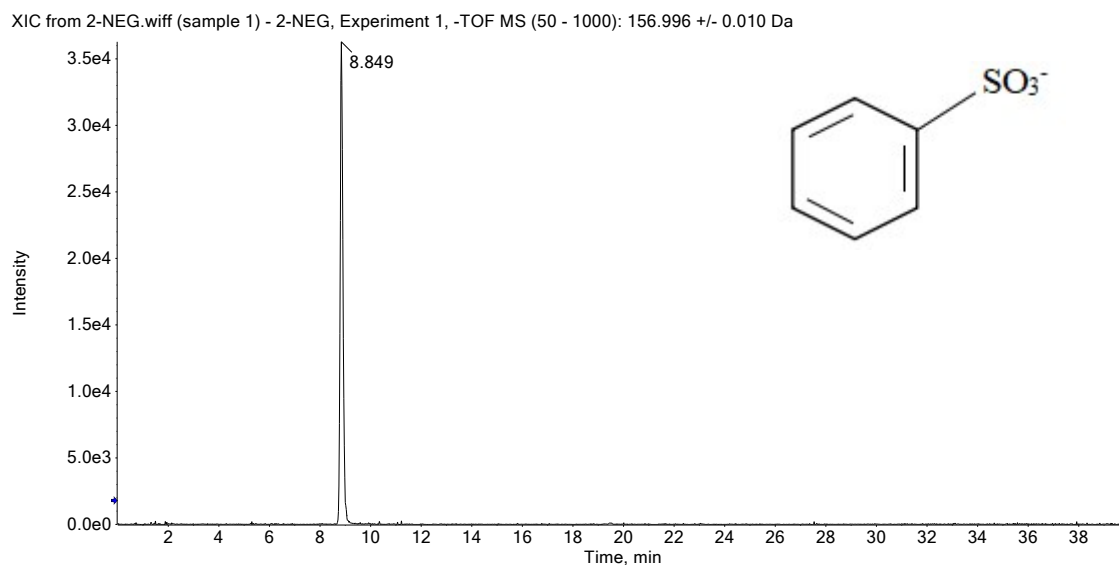

**Fig. S7** Mass spectrum of the MO solution under the 60-min visible-light irradiation over the hierarchical Cu<sub>2</sub>O hollow spheres.

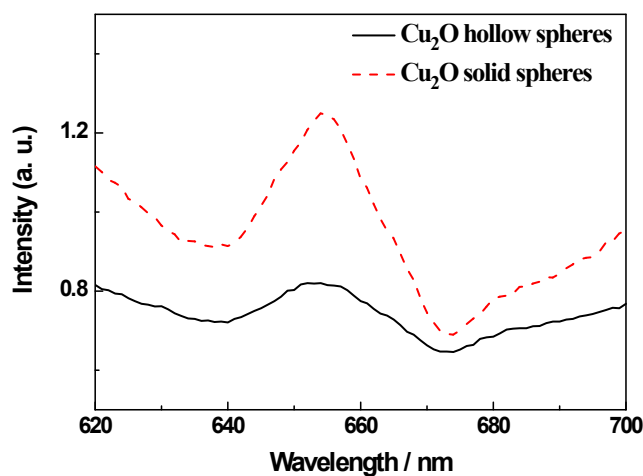

**Fig. S8** PL spectra of Cu<sub>2</sub>O hollow spheres and Cu<sub>2</sub>O solid spheres at an excitation wavelength of 436 nm.

## References

- 1 X. Yang, S. Zhang, L. Zhang, B. Zhang and T. Ren, *RSC Adv.*, 2019, **9**, 36831-36837.
- 2 R. Chen, Z. Wang, Q. Zhou, J. Lu and M. Zheng, *Materials*, 2018, **11**, 1843.
- 3 W.-C. Huang, L.-M. Lyu, Y.-C. Yang and M. H. Huang, *J. Am. Chem. Soc.*, 2012, **134**, 1261-1267.
- 4 J. Shi, J. Li, X. Huang and Y. Tan, *Nano Res.*, 2011, **4**, 448-459.
- 5 M. Singh, D. Jampaiah, A. E. Kandjani, Y. M. Sabri, E. D. Gaspera, P. Reineck, M. Judd, J. Langley, N. Cox, J. van Embden, E. L. H. Mayes, B. C. Gibson, S. K. Bhargava, R. Ramanathan and V. Bansal, *Nanoscale*, 2018, **10**, 6039-6050.
- 6 L. Zhang, P. Ying, B. Yu, L. Wu, J. Wang, X. Gu, S. Chen, R. Zhou and Z. Ni, *RSC Adv.*, 2014, **4**, 42892-42898.
- 7 H. Zhang, F. Liu, B. Li, J. Xu, X. Zhao and X. Liu, *RSC Adv.*, 2014, **4**, 38059-38063.

- 8 C. J. Munro, E. C. Bell, M. O. Olagunju, J. L. Cohn, E. M. Zahran, L. G. Bachas and M. R. Knecht, *ACS Sustainable Chem. Eng.*, 2019, **7**, 17055-17064.
